# Supplementary material for: Surface and lattice engineered ruthenium superstructures towards high-performance bifunctional hydrogen catalysis
Source: Royal Society of Chemistry journal article supplement (doi:10.1039/d2ee02076a), 2022-11-09
Supplement: d2ee02076a1.pdf [file d2ee02076a1.pdf]

Supporting information for

**Surface and Lattice Engineered Ruthenium Superstructures towards High-Performance Bifunctional Hydrogen Catalysis**

Leigang Li,<sup>a</sup> Shangheng Liu,<sup>a</sup> Changhong Zhan,<sup>a</sup> Yan Wen,<sup>a</sup> Zhefei Sun,<sup>b</sup> Jijia Han,<sup>\*b</sup> Ting-Shan Chan,<sup>c</sup> Qiaobao Zhang,<sup>\*b</sup> Zhiwei Hu,<sup>d</sup> Xiaoqing Huang<sup>\*a</sup>

E-mail: jijiahan@xmu.edu.cn; zhangqiaobao@xmu.edu.cn; hxq006@xmu.edu.cn

## Experimental Procedures

### 1.1 Synthesis of Mo-Ru NSAs

For the typical synthesis of Mo-Ru NSAs, 8.0 mg ruthenium carbonyl ( $\text{Ru}_3(\text{CO})_{12}$ , > 98%, from dramas-beta), 2.5 mg molybdenum carbonyl ( $\text{Mo}(\text{CO})_6$ , 98%, from Sigma Aldrich), 30 mg salicylic acid ( $\text{C}_7\text{H}_6\text{O}_3$ ,  $\geq 99.5\%$ , Sinopharm Chemical Reagent Co.), and 5.0 mL oleylamine (OAm,  $\text{C}_{18}\text{H}_{37}\text{N}$ , from J&K Scientific Ltd.) were put in a glass vial and homogeneously mixed by ultrasonication. The glass vial was then transferred into an oil bath and heated at 230 °C for 3 h. After cooling down to room temperature, the product was collected by high-speed centrifugation and washed for three times with a mixture of cyclohexane/ethanol.

### 1.2 Characterization

The morphology of the synthesized sample was firstly characterized by a low-magnification transmission electron microscope (TEM, Hitachi HT7700, 120 kV). An FEI Tecnai F20 TEM (200 kV) was employed to get the HAADF STEM images, high-magnification TEM images, and EDS line scan/mapping. The TEM sample for characterization was prepared by dropping cyclohexane dispersion of the synthesized product onto a carbon-coated Cu grid and dried at ambient conditions. An energy dispersive X-ray spectrometer coupled within a Zeiss scanning electron microscope was used to acquire the chemical composition. The XRD pattern was obtained by a X'Pert-Pro MPD diffractometer with a Cu  $\text{K}_\alpha$  X-ray source ( $\lambda = 1.540598 \text{ \AA}$ ). An SSI S-Probe XPS spectrometer was employed to acquire the surface chemical information. The XAS spectra were acquired at the BL01C1 beamline of the National Synchrotron Radiation Research Center (NSRRC, Hsinchu, Taiwan). The data were processed according to standard procedures using the software of Demeter program package (Version 0.9.24).<sup>1</sup>

### 1.3 Electrochemical measurement

The HER performance of the catalysts was evaluated by a three-electrode system on an electrochemical station (CHI660, Chenhua, Shanghai). For the typical preparation of catalyst ink, a certain amount of catalyst was dissolved in a mixture of isopropanol and Nafion (volume ratio, 50:1) to get a catalyst concentration of 1  $\mu\text{g}/\mu\text{L}$ . The mixture was homogeneously mixed by ultrasonication for 30 min to get the catalyst ink. The catalyst ink (10  $\mu\text{L}$ ) was then dropped onto a glassy carbon (GC) electrode (0.196  $\text{cm}^2$ ) and dried naturally as the working electrode. A graphite rod and a saturated calomel electrode (SCE) was used as the counter electrode and reference electrode, respectively. The electrochemical test was performed in 1 M KOH. For linear sweep voltammetry (LSV) polarization scan, a scan rate of 5 mV/s is used. A rotating disk electrode (RDE, Pine, diameter: 5 mm) was used

to measure the HOR performance with a graphite rod as the counter electrode and a SCE as the reference electrode, respectively. The measurement was performed in H<sub>2</sub>-saturated 0.1 M KOH electrolyte at a scan rate of 5 mV/s. Catalyst ink with a Ru concentration of 0.5 μg/μL was prepared and 2 μL catalyst ink was dropped onto the RDE which was dried naturally under ambient atmosphere. All the potentials in SCE were transformed to reversible hydrogen electrode (RHE) potentials. During the LSV measurement, 95% iR compensation was applied.

For HOR, the kinetic current density ( $j_k$ ) was analyzed by the Koutecky-Levich equation:

$$\frac{1}{j} = \frac{1}{j_k} + \frac{1}{j_d}$$

where  $j$  is the measured current density and  $j_d$  is the diffusion-limited current density.  $j_k$  and  $j_d$  can be fitted using the Butler-Volmer equation and Levich equation, respectively.

$$j_k = j_0 \left( e^{\frac{\alpha_a F \eta}{RT}} - e^{-\frac{\alpha_c F \eta}{RT}} \right)$$

$$j_d = 0.62nFD^{3/2}\nu^{-1/6}C_0\omega^{1/2} = BC_0\omega^{1/2}$$

where  $\alpha_a$  and  $\alpha_c$  are anodic and cathodic electron transfer coefficient, respectively ( $\alpha_a + \alpha_c = 1$ ),  $F$  the Faraday constant,  $\eta$  the overpotential,  $R$  the universal gas constant,  $T$  the Kelvin temperature,  $n$  the electron number,  $D$  the diffusion coefficient,  $\nu$  the viscosity coefficient,  $C_0$  the solubility,  $\omega$  the rotating speed, and  $B$  the Levich constant.

## 1.4 DFT

Spin-polarized DFT calculations were performed by using Vienna Ab initio Simulation Package (VASP).<sup>2</sup> The Perdew-Burke-Erzenhof (PBE) functional in the generalized gradient approximation (GGA) was applied to describe the exchange-correlation energy.<sup>3</sup> The wave functions were employed in a plane wave basis set with an energy cutoff of 600 eV. The convergence criteria for energy and force were set to be 10<sup>-5</sup> eV and 0.02 eV/Å, respectively. The zero damping DFT-D3 method of Grimme<sup>4</sup> was adopted in describing van der Waals interactions. The 4×4×1 supercell of Ru(101) and Ru(002) facet with six layers was taken as the substrate model with a Gamma centered 3 × 3 × 1 k-point mesh. To reproduce the bulk properties, two bottom layers were fixed. The Brillouin zone was sampled by Gamma centered 3×3×1 Monkhorst-Pack grid for structural optimizations. All the slab models were separated by a vacuum of 15 Å thickness to ensure decoupling between neighboring slabs.

The adsorption free energy ( $\Delta G$ ) as a result of electrochemical adsorption reactions is calculated using the following expression:

$$\Delta G = \Delta E + \Delta E_{ZPE} - T\Delta S$$

where  $\Delta E$  is the change in total energy obtained from DFT,  $\Delta E_{\text{ZPE}}$  and  $S$  are the changes in zero-point energy and entropy at standard conditions with  $T = 298.15$  K.

The adsorption energy  $\Delta E$  for a given site is defined as

$$\Delta E = E_{\text{surf} + \text{ads}} - E_{\text{surf}} - E_{\text{ads}}$$

where  $E_{\text{surf}}$  is the surface energy,  $E_{\text{ads}}$  is the energy of adsorbate, and  $E_{\text{surf} + \text{ads}}$  is the total system energy.

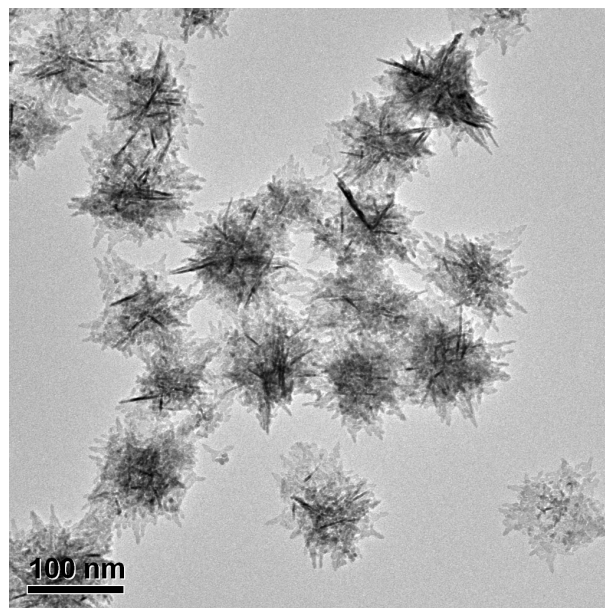

**Figure S1.** TEM image of Mo-Ru NSAs.

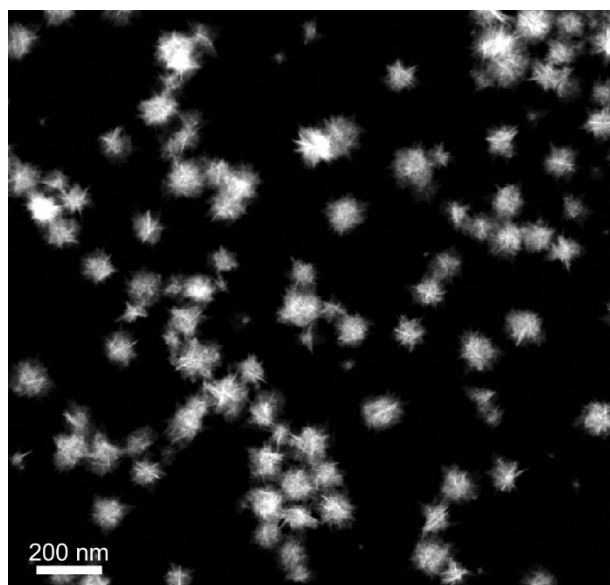

**Figure S2.** STEM image of Mo-Ru NSAs.

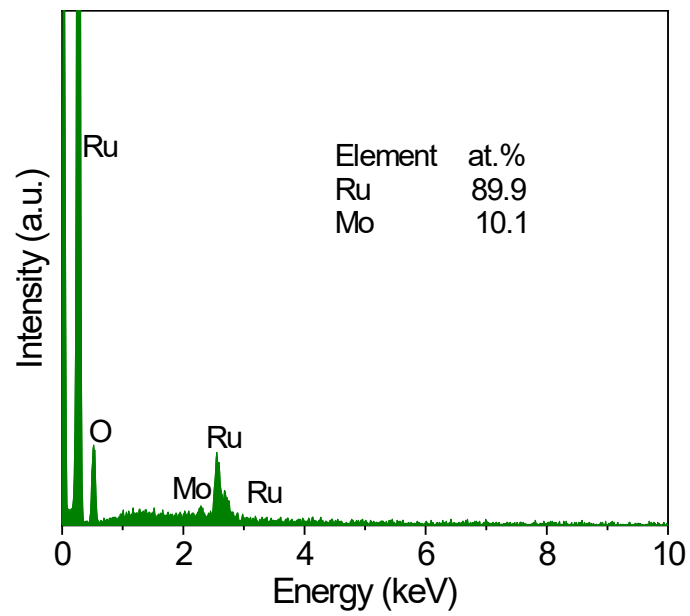

**Figure S3.** EDS spectrum showing the chemical composition of Mo-Ru NSAs.

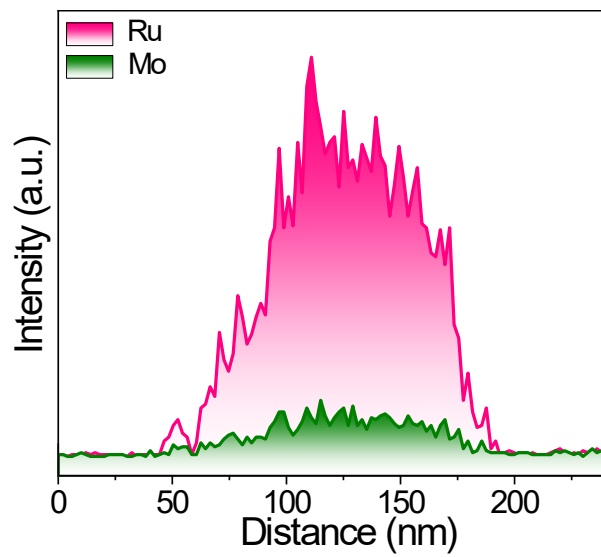

**Figure S4.** EDS line scan of Mo-Ru NSAs.



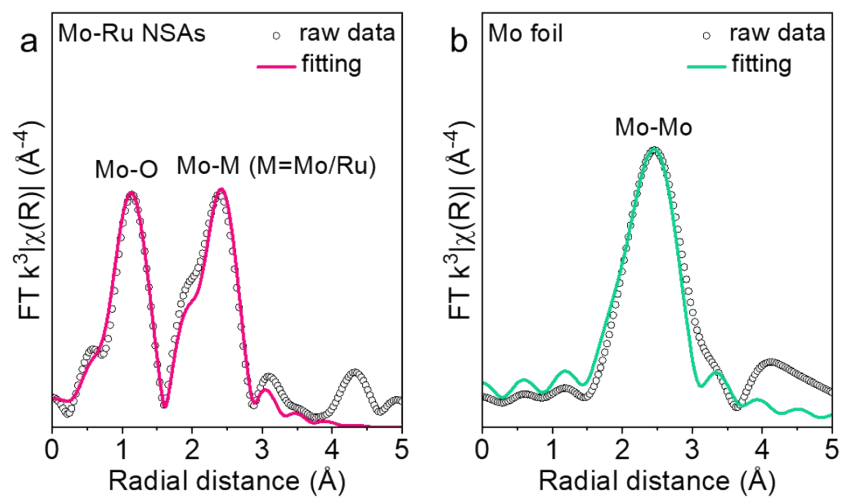

**Figure S5.**  $k^3$ -weighted Fourier transformation and fitting of EXAFS spectra of (a) Mo-Ru NSAs and (b) Mo foil in R space.

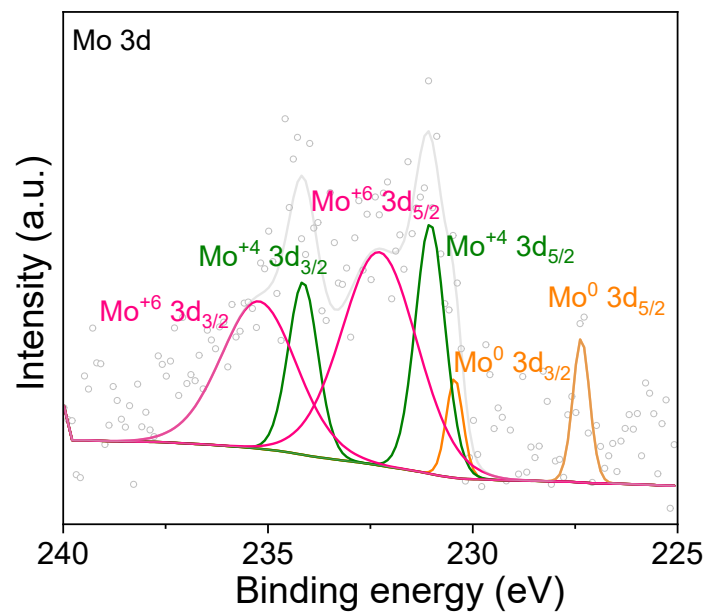

**Figure S6.** Mo 3d XPS spectrum of Mo-Ru NSAs.

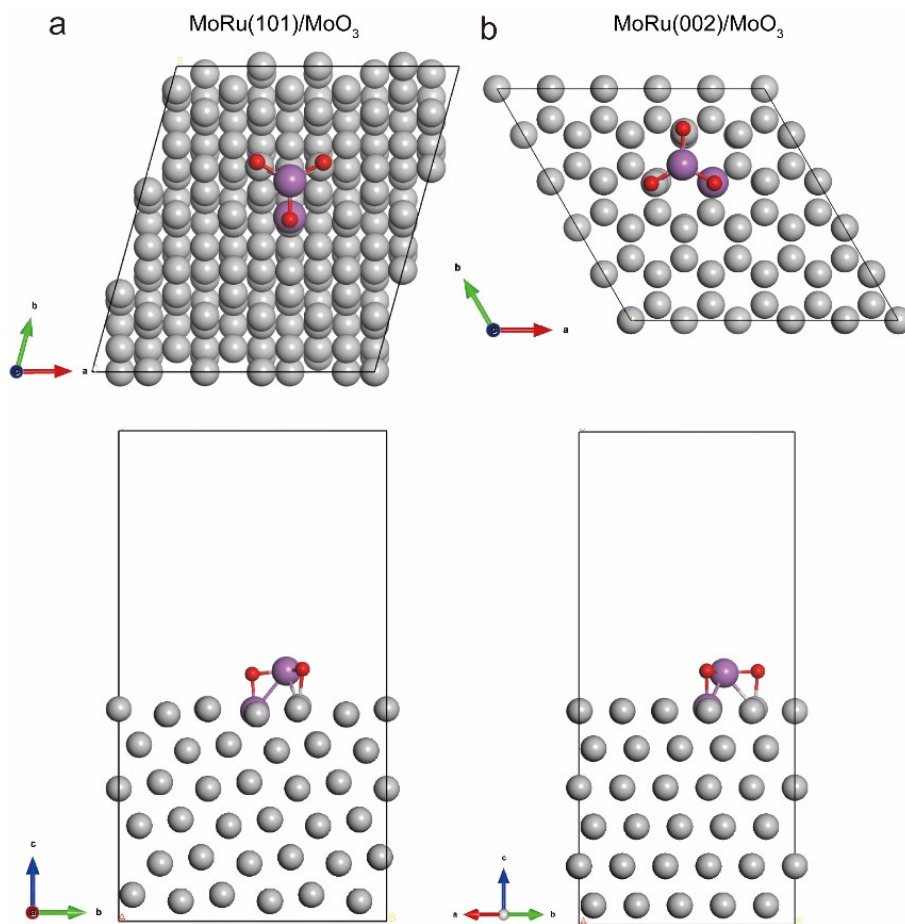

**Figure S7.** Atomic structures of (a) MoRu(101)/MoO<sub>3</sub> and (b) MoRu(002)/MoO<sub>3</sub>.

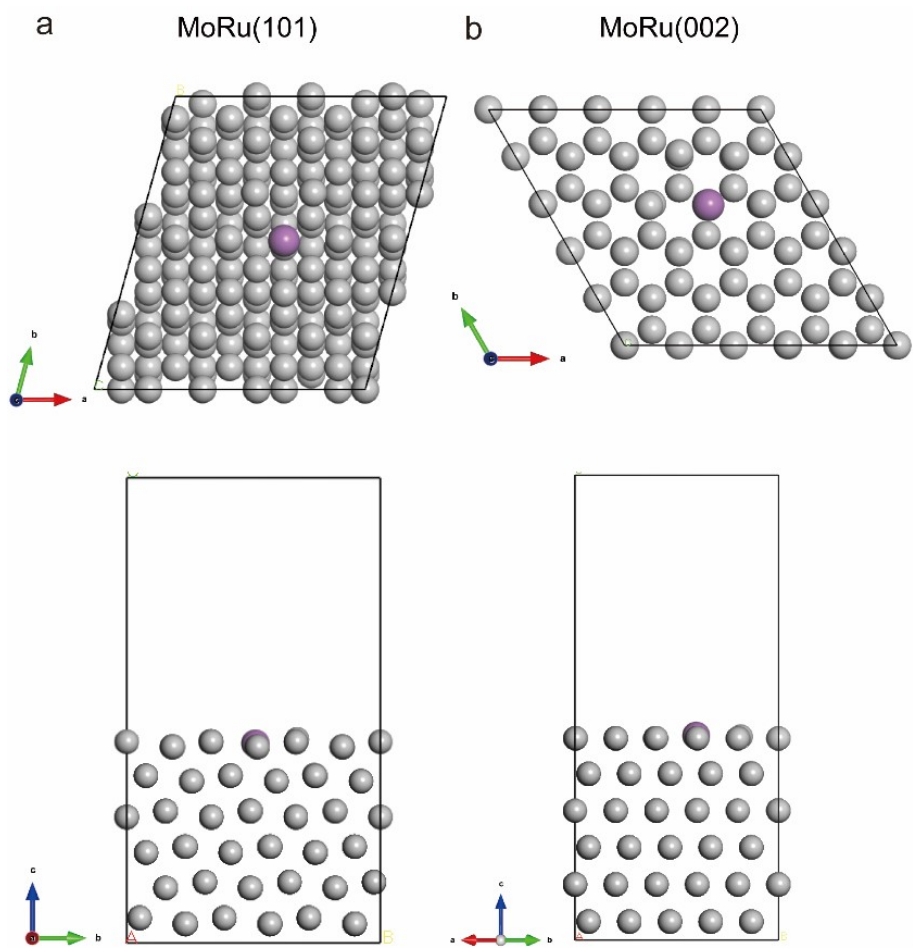

**Figure S8.** Atomic structures of (a) MoRu(101) and (b) MoRu(002).

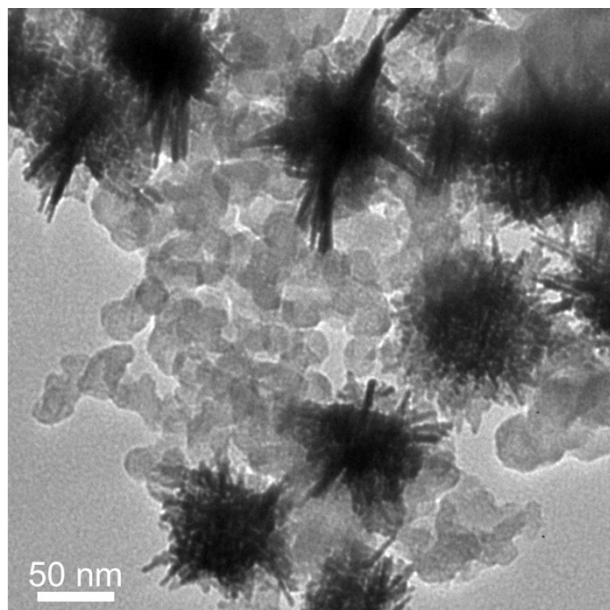

**Figure S9.** TEM image of Mo-Ru NSAs loaded on carbon powder.

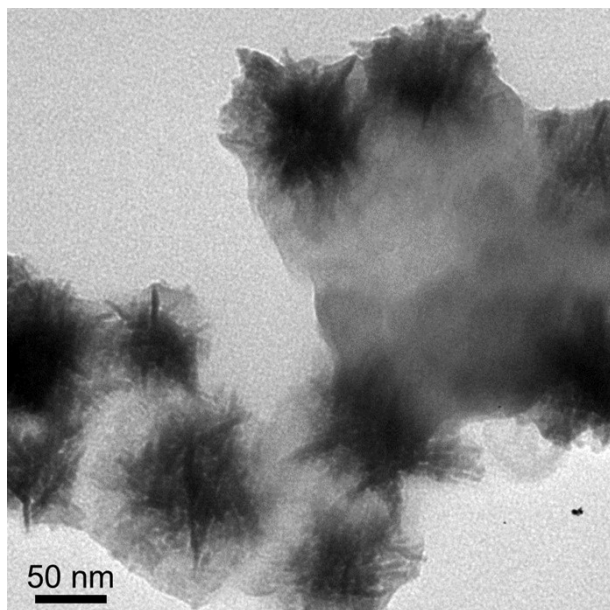

**Figure S10.** TEM image of Mo-Ru NSAs annealed at 250 °C for 0.5 h in air.

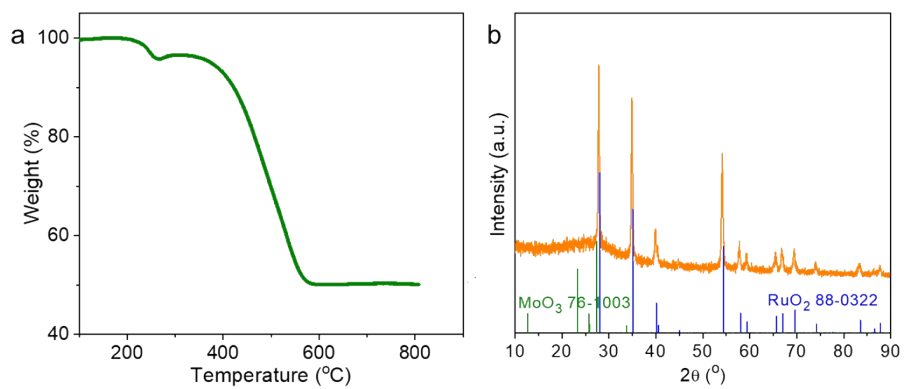

**Figure S11.** (a) TG plot of Mo-Ru NSAs. (b) XRD pattern of Mo-Ru NSAs annealed at 800 °C in air.

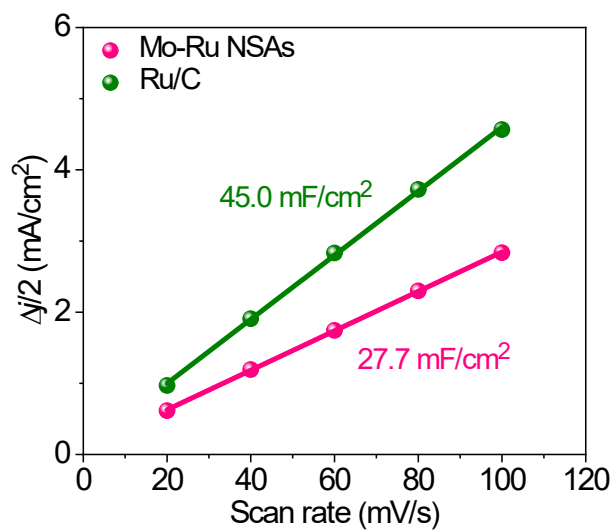

**Figure S12.** Electrochemical double-layer capacitance ( $C_{dl}$ ) of Mo-Ru NSAs and commercial Ru/C.



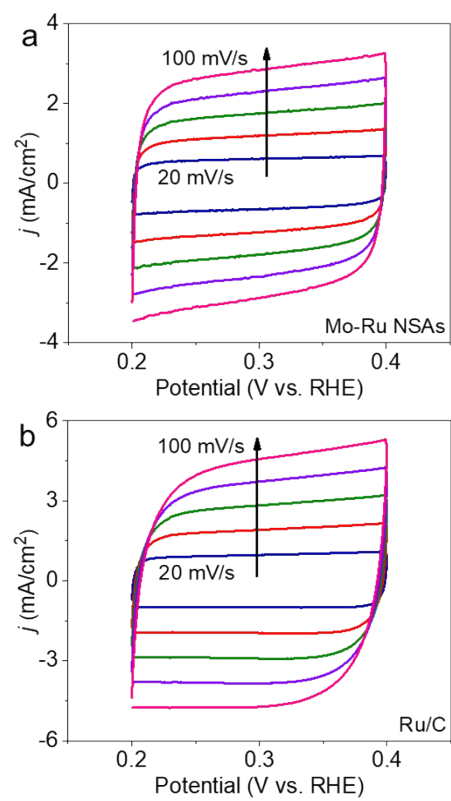

**Figure S13.** CV scans of (a) Mo-Ru NSAs and (b) commercial Ru/C.

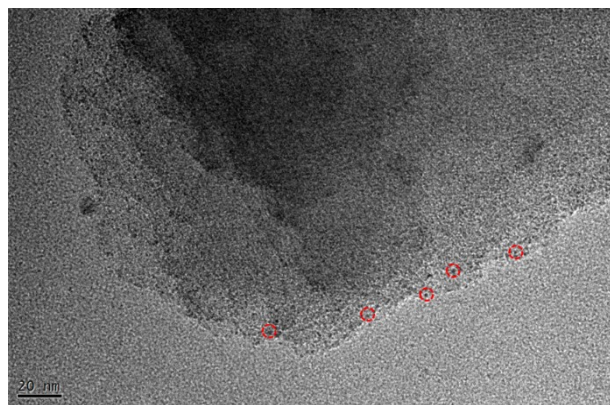

**Figure S14.** TEM image of commercial Ru/C.

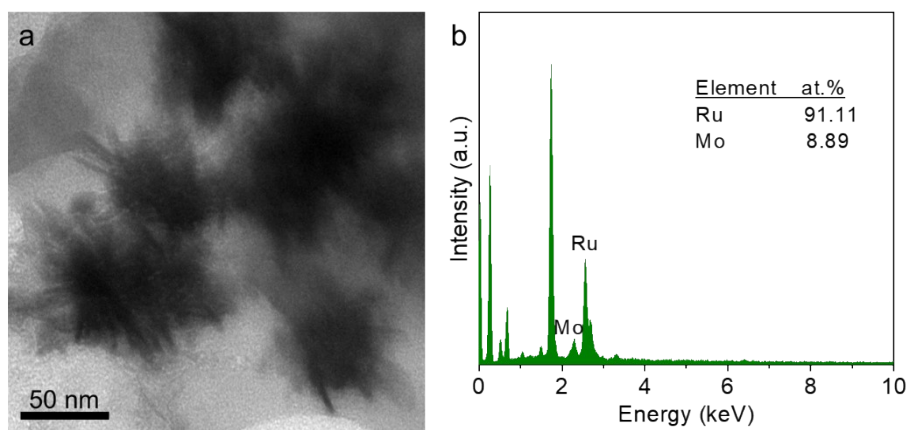

**Figure S15.** (a) TEM image and (b) EDS spectrum of Mo-Ru NSAs after HER stability test.

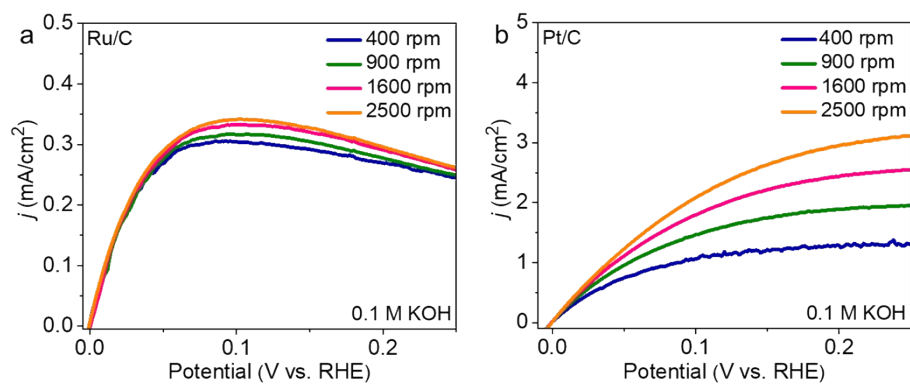

**Figure S16.** HOR polarization curves of commercial (a) Ru/C and (b) Pt/C in H<sub>2</sub>-saturated 0.1 M KOH.

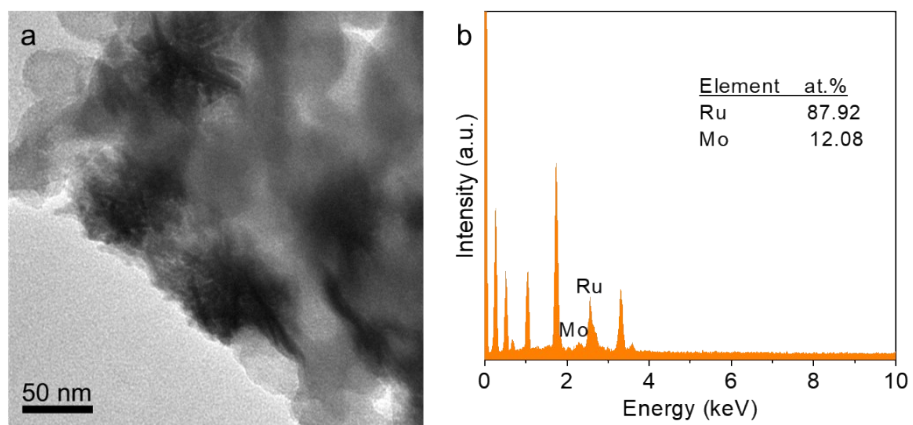

**Figure S17.** (a) TEM image and (b) EDS spectrum of Mo-Ru NSAs after HOR stability test.

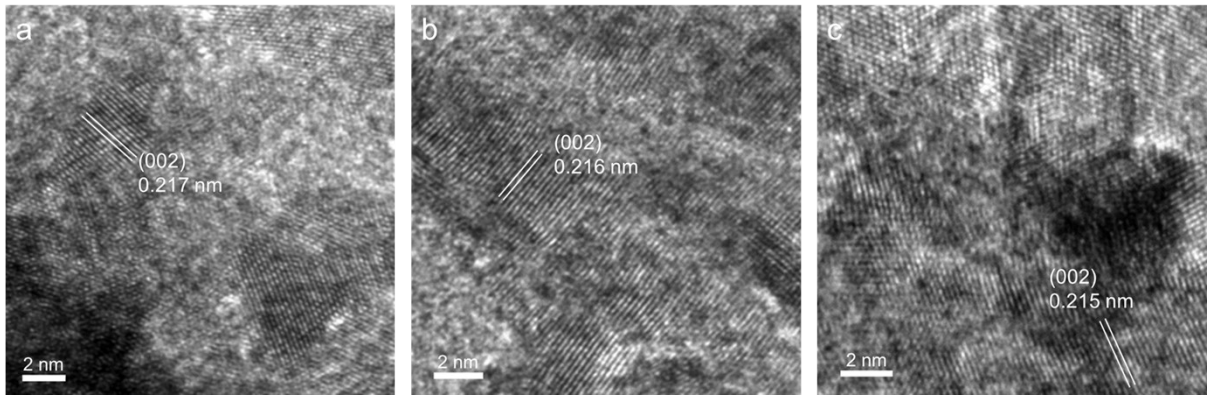

**Figure S18.** TEM images of Mo-Ru NSAs (a) before stability test, (b) after HER stability test, and (c) after HOR stability test.

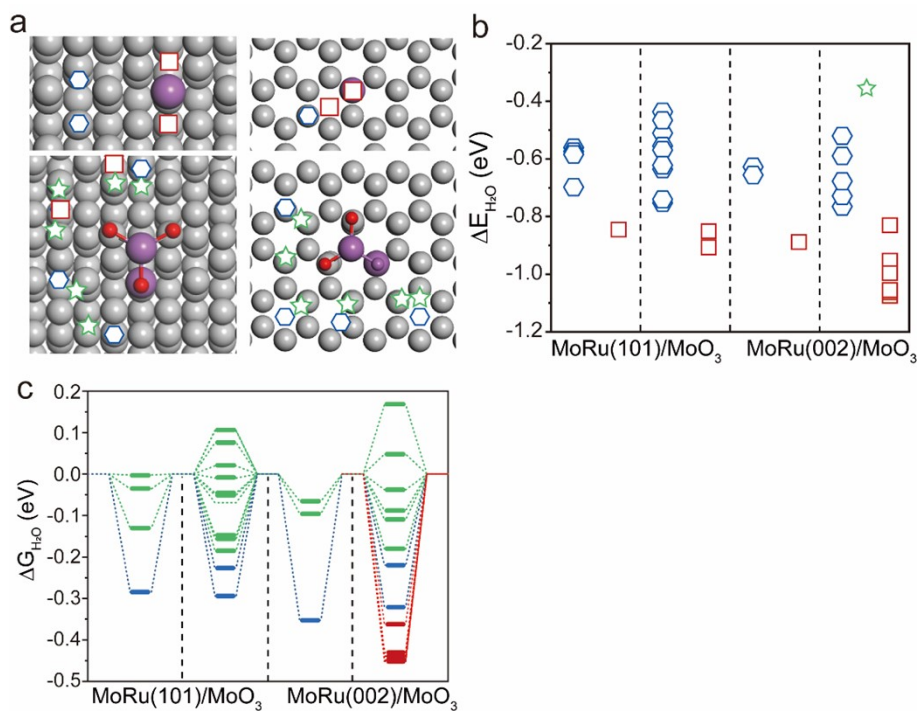

**Figure S19.** (a) Diagram of corresponding adsorption sites of  $\text{OH}^*$ , where green five-pointed stars, blue hexagons and red squares represent weakly, moderately and strongly adsorbed sites, respectively. (b) Adsorption energy  $\Delta E$  of  $\text{H}_2\text{O}^*$  at different adsorption sites of different surfaces. (c) Gibbs free energy diagrams of absorbed  $\text{H}_2\text{O}^*$  on different surfaces.

**Table S1.** Structural parameters of the samples obtained from EXAFS fitting for Ru K-edge.

| <b>sample</b> | <b>path</b> | <b>N</b>      | <b>R (Å)</b>    | <b><math>\Delta E_0</math> (eV)</b> | <b><math>\sigma^2</math><br/>(<math>\times 10^{-3} \text{Å}^2</math>)</b> | <b>R-factor</b> |
|---------------|-------------|---------------|-----------------|-------------------------------------|---------------------------------------------------------------------------|-----------------|
| Mo-Ru<br>NSAs | Ru-Ru       | 5.4 $\pm$ 0.9 | 2.68 $\pm$ 0.01 | -5.78 $\pm$ 1.51                    | 5.03 $\pm$ 0.94                                                           | 0.015           |
|               | Ru-O        | 2.7 $\pm$ 1.5 | 1.94 $\pm$ 0.05 | -9.68 $\pm$ 9.80                    | 7.78 $\pm$ 6.28                                                           |                 |
| Ru foil       | Ru-Ru       | 12            | 2.67 $\pm$ 0.03 | 9.02 $\pm$ 0.66                     | 3.60 $\pm$ 0.40                                                           | 0.009           |

N, coordination number; R, distance between absorber and backscatter atoms;  $\Delta E_0$ , inner potential correction to account for the difference in the inner potential between the sample and the reference compound.  $\sigma^2$ , Debye-Waller factor.



**Table S2.** Structural parameters of the samples obtained from EXAFS fitting for Mo K-edge.

| sample        | path   | N       | R (Å)     | $\Delta E_0$ (eV) | $\sigma^2$<br>( $\times 10^{-3} \text{Å}^2$ ) | R-factor |
|---------------|--------|---------|-----------|-------------------|-----------------------------------------------|----------|
| Mo-Ru<br>NSAs | Mo-Mo1 | 2.9±1.2 | 2.73±0.04 | -5.81±3.14        | 8.14±3.47                                     | 0.014    |
|               | Mo-O   | 3.2±1.6 | 1.72±0.04 | -18.0±8.10        | 8.70±5.47                                     |          |
| Mo foil       | Mo-Mo1 | 8       | 2.72±0.01 | -6.21±1.28        | 2.66±0.95                                     | 0.001    |
|               | Mo-Mo2 | 6       | 3.15±0.02 | -3.96±2.66        | 2.25±1.42                                     |          |

N, coordination number; R, distance between absorber and backscatter atoms;  $\Delta E_0$ , inner potential correction to account for the difference in the inner potential between the sample and the reference compound.  $\sigma^2$ , Debye-Waller factor.

**Table S3.** Comparison of HER performance of various catalysts in alkaline electrolytes.

| Catalyst                               | Electrolyte    | Overpotential (mV)<br>at 10 mA/cm <sup>2</sup> | Ref.                                                            |
|----------------------------------------|----------------|------------------------------------------------|-----------------------------------------------------------------|
| <b>Mo-Ru NSAs</b>                      | <b>1 M KOH</b> | <b>16</b>                                      | <b>This work</b>                                                |
| Ru/N-doped C                           | 1 M KOH        | 32                                             | <i>Energy Environ. Sci.</i> <b>2018</b> , <i>11</i> , 800       |
| Ru@C <sub>2</sub> N                    | 1 M KOH        | 17                                             | <i>Nat. Nanotechnol.</i> <b>2017</b> , <i>12</i> , 441-446      |
| Pt <sub>3</sub> Ni <sub>2</sub> -NWS-S | 1 M KOH        | 42                                             | <i>Nat. Commun.</i> <b>2017</b> , <i>8</i> , 14580              |
| Pt NWs                                 | 1 M KOH        | 50                                             | <i>Adv. Funct. Mater.</i> <b>2018</b> , <i>28</i> , 1803722     |
| RuP <sub>2</sub> @NPC                  | 1 M KOH        | 52                                             | <i>Angew. Chem. Int. Ed.</i> <b>2017</b> , <i>56</i> , 11559    |
| Ru/MoO <sub>2</sub>                    | 1 M KOH        | 29                                             | <i>J. Mater. Chem. A</i> <b>2017</b> , <i>5</i> , 5475          |
| NiO/Ru@porous Ni                       | 1 M KOH        | 39                                             | <i>J. Mater. Chem. A</i> <b>2019</b> , <i>7</i> , 2344          |
| Ru <sub>3</sub> Ni <sub>3</sub>        | 1 M KOH        | 39                                             | <i>iScience</i> <b>2019</b> , <i>11</i> , 492                   |
| a-RuTe <sub>2</sub> PNRs               | 1 M KOH        | 36                                             | <i>Nat. Commun.</i> <b>2019</b> , <i>10</i> , 5692              |
| RuP/C                                  | 1 M KOH        | 18                                             | <i>Adv. Mater.</i> <b>2018</b> , <i>30</i> , 1800047            |
| RuCu NSs                               | 1 M KOH        | 20                                             | <i>Angew. Chem. Int. Ed.</i> <b>2019</b> , <i>58</i> , 13983    |
| RuMn NSBs                              | 1 M KOH        | 20                                             | <i>Adv. Mater.</i> <b>2021</b> , 2105308                        |
| Sr <sub>2</sub> RuO <sub>4</sub>       | 1 M KOH        | 61                                             | <i>Nat. Commun.</i> <b>2019</b> , <i>10</i> , 149               |
| Ir NWs                                 | 1 M KOH        | 38                                             | <i>Adv. Funct. Mater.</i> <b>2018</b> , <i>28</i> , 1803722     |
| Cu <sub>2-x</sub> S/Ru                 | 1 M KOH        | 82                                             | <i>Small</i> <b>2017</b> , <i>13</i> , 1700052                  |
| Pt-Ni ASs                              | 1 M KOH        | 27.7                                           | <i>Adv. Mater.</i> <b>2018</b> , 1801741                        |
| Ru-S-2/C                               | 1 M KOH        | 40                                             | <i>Catal. Sci. Technol.</i> <b>2021</b> , <i>11</i> , 3865-3872 |
| Ru-NiCo-LDH                            | 1 M KOH        | 28                                             | <i>Electrochem. Commun.</i>                                     |

|                      |         |    |                                                 |
|----------------------|---------|----|-------------------------------------------------|
|                      |         |    | <b>2019, 101, 23-27</b>                         |
| Pd <sub>3</sub> Ru/C | 1 M KOH | 42 | <i>ACS Catal.</i> <b>2019</b> , 9,<br>9614-9621 |

**Table S4.** Comparison of HOR performance of various catalysts in alkaline electrolytes.

| Catalyst                                        | Electrolyte      | Mass activity<br>(A/mg) | Ref.                                                                    |
|-------------------------------------------------|------------------|-------------------------|-------------------------------------------------------------------------|
| <b>Mo-Ru NSAs</b>                               | <b>0.1 M KOH</b> | <b>2.45</b>             | <b>This work</b>                                                        |
| Ir <sub>3</sub> Pd <sub>1</sub> Ru <sub>6</sub> | 0.1 M KOH        | 0.34                    | <i>J. Am. Chem. Soc.</i> <b>2017</b> ,<br>139, 6807-6810                |
| Ru nanoassembly                                 | 0.1 M KOH        | 0.0376                  | <i>Appl. Catal. B-Environ.</i><br><b>2019</b> , 258, 117952             |
| Mo-Ru-2/C                                       | 0.1 M KOH        | 1.86                    | <i>ACS Sustainable Chem.<br/>Eng.</i> <b>2022</b> , 10, 1616-<br>1623   |
| fcc Ru                                          | 0.1 M KOH        | 0.1204                  | <i>J. Energy Chem.</i> <b>2021</b> ,<br>61, 15-22                       |
| Ir <sub>9</sub> Ru <sub>1</sub> /C              | 0.1 M KOH        | 0.74                    | <i>J. Am. Chem. Soc.</i> <b>2017</b> ,<br>139, 6807-6810                |
| P-Rh/C                                          | 0.1 M KOH        | 0.683                   | <i>J. Mater. Chem. A</i> <b>2020</b> ,<br>8, 11923-11927                |
| BCC PdCu                                        | 0.1 M KOH        | 1.727                   | <i>J. Am. Chem. Soc.</i> <b>2018</b> ,<br>140, 16580-16588              |
| IrNi@PdIr/C                                     | 0.1 M KOH        | 0.854                   | <i>Nanoscale</i> <b>2018</b> , 10,<br>4872-4881                         |
| IO-Ru-TiO <sub>2</sub> /C                       | 0.1 M KOH        | 0.907                   | <i>J. Mater. Chem. A</i> <b>2020</b> ,<br>8, 10168-10174                |
| PtNb/NbO <sub>x</sub> -C                        | 0.1 M KOH        | 0.36                    | <i>ACS Catal.</i> <b>2017</b> , 7,<br>4936-4946                         |
| Ru <sub>0.95</sub> Fe <sub>0.05</sub> NPs       | 0.1 M KOH        | 0.16                    | <i>ACS Catal.</i> <b>2020</b> , 10,<br>4608-4616                        |
| IrMo <sub>0.59</sub> NPs                        | 0.1 M KOH        | 0.5                     | <i>ACS Catal.</i> <b>2020</b> , 10,<br>7322-7327                        |
| Ru-Ir(1/1)                                      | 0.1 M NaOH       | 0.22                    | <i>ACS Appl. Mater.<br/>Interfaces</i> <b>2020</b> , 12,<br>22771-22777 |
| P-Ru/C                                          | 0.1 M KOH        | 0.43                    | <i>ACS Catal.</i> <b>2020</b> , 10,<br>11751-11757                      |
| PtRu/Mo <sub>2</sub> C-TaC                      | 0.1 M KOH        | 0.403                   | <i>ACS Catal.</i> <b>2021</b> , 11,<br>932-947                          |
| PtRu/Mo <sub>2</sub> C                          | 0.1 M KOH        | 0.239                   | <i>ACS Catal.</i> <b>2021</b> , 11,<br>932-947                          |

|                         |            |         |                                                                     |
|-------------------------|------------|---------|---------------------------------------------------------------------|
| hcp Ru                  | 0.1 M KOH  | 0.08721 | <i>J. Energy Chem.</i> <b>2021</b> ,<br>61, 15-22                   |
| Ru@Pt <sub>1.4MLE</sub> | 0.1 M NaOH | 1.309   | <i>J. Electrochem. Soc.</i><br><b>2018</b> , 165, H229-H239         |
| Ru/C                    | 0.1 M NaOH | 0.022   | <i>ACS Appl. Mater. Interfaces</i> <b>2020</b> , 12,<br>22771-22777 |

## References

1. B. Ravel and M. Newville, *J. Synchrotron Radiat.* 2005, **12**, 537-541.
2. G. Kresse and J. Furthmüller, *Phys. Rev. B* 1996, **54**, 11169-11186.
3. J. P. Perdew, K. Burke and M. Ernzerhof, *Phys. Rev. Lett.* 1996, **77**, 3865-3868.
4. S. Grimme, *J. Comput. Chem.* 2006, **27**, 1787-1799.
